1 **Assessment of Neurovascular Coupling & Cortical Spreading Depression in Mixed Models of**  
2 **Atherosclerosis & Alzheimer's Disease**

3 Osman Shabir<sup>1,2,4</sup>, Ben Pendry<sup>3</sup>, Llywelyn Lee<sup>1,2</sup>, Beth Eyre<sup>1,2</sup>, Paul Sharp<sup>1</sup>, Monica A Rebolgar<sup>2,3</sup>, Clare  
4 Howarth<sup>1,2</sup>, Paul R Heath<sup>2,3</sup>, Stephen B Wharton<sup>2,3</sup>, Sheila E Francis<sup>2,4,5†</sup> & Jason Berwick<sup>1,2,5†\*</sup>

5  
6 *†Authors Contributed Equally.*

7 \*Corresponding Author: Dr Jason Berwick, Sheffield Neurovascular Lab, Department of Psychology,  
8 The University of Sheffield, Alfred Denny Building, Western Bank, Sheffield, S10 2TN (United Kingdom).  
9 Email: [j.berwick@sheffield.ac.uk](mailto:j.berwick@sheffield.ac.uk) Phone: (+44) 0114 222 6597

10

11 Author Affiliations:

12 <sup>1</sup>Sheffield Neurovascular Lab, Department of Psychology, University of Sheffield, Alfred Denny  
13 Building, Western Bank, Sheffield, S10 2TN (United Kingdom)

14 <sup>2</sup>Neuroscience Institute, University of Sheffield, Sheffield, S10 2TN (United Kingdom)

15 <sup>3</sup>Sheffield Institute for Translational Neuroscience (SiTraN), University of Sheffield, 385a Glossop  
16 Road, Sheffield, S10 2HQ (United Kingdom)

17 <sup>4</sup>Department of Infection, Immunity & Cardiovascular Disease (IICD), University of Sheffield Medical  
18 School, Royal Hallamshire Hospital, Beech Hill Road, Sheffield, S10 2RX (United Kingdom)

19 <sup>5</sup>Healthy Lifespan Institute (HELSI), University of Sheffield, Sheffield, S10 2TN (United Kingdom)

20

21 **Classification:** Biological Sciences – Neuroscience

22

23 **Abstract.** Neurovascular coupling is a critical brain mechanism whereby changes to blood flow  
24 accompany localised neural activity. The breakdown of neurovascular coupling is linked to the  
25 development and progression of several neurological conditions including dementia. However,  
26 experimental data commonly arise from preclinical models in young mice with one disease only. In this  
27 study, we examined cortical haemodynamics in preparations that modelled common co-existing  
28 conditions namely Alzheimer's disease (J20-AD) combined with atherosclerosis (PCSK9-ATH)  
29 between 9-12m of age. We report novel findings with atherosclerosis where neurovascular decline is  
30 characterised by significantly reduced blood volume (HbT), levels of oxyhaemoglobin (HbO) &  
31 deoxyhaemoglobin (HbR), in addition to global neuroinflammation. In the comorbid mixed model (J20-  
32 PCSK9-MIX), we report a highly significant increase (3x fold) in hippocampal amyloid-beta plaques,  
33 without any further alterations to neurovascular function. There were no significant changes in evoked  
34 neural activity in any of the disease models, suggesting a breakdown of neurovascular coupling in  
35 PCSK9-ATH mice with inadequate oxygen delivery. A key finding was that cortical spreading  
36 depression (CSD) due to electrode insertion into the brain was worse in the diseased animals and led  
37 to a prolonged period of hypoxia and potentially ischaemia. The inflammatory environment in the brain  
38 was also perturbed, with interleukin-1 beta raised up to 2-fold and tumour necrosis factor raised up to  
39 7-fold in brain tissues from these mice. Taken together, these findings suggest that systemic

1 atherosclerosis can be detrimental to neurovascular health and that having cardiovascular  
2 comorbidities can exacerbate pre-existing Alzheimer's-related amyloid-plaques.

3

4 **Significance Statement.** The development of therapies for dementia is one of the biggest scientific  
5 priorities as many amyloid-targeting treatments have failed clinical trials in the past, and to date, we  
6 have no disease modifying therapies. Understanding the different disease mechanisms involved in the  
7 onset of dementia is important if therapies are to succeed. Evidence has pointed to vascular dysfunction  
8 as a key potential mechanism involved in dementia onset and many preclinical studies have highlighted  
9 the role of impaired neurovascular coupling in such models. In this study we report novel findings with  
10 respect to neurovascular dysfunction in disease models, as well as describing how brain state plays a  
11 role in worsened outcomes of brain injury and migraine in the context of dementia onset.

12

13 **Key Words:** Neurovascular coupling, atherosclerosis, Alzheimer's disease, CSD, comorbid

14

15 **Author Contributions:** OS performed the majority of the *in vivo* experiments and authored the  
16 manuscript. OS & JB designed the experiments. OS, BP, LL, BE, PS & MAR performed experiments.  
17 OS, CH & JB performed MATLAB and data analysis. JB, SEF, CH, PRH & SBW supervised the  
18 research and provided editorial guidance. All authors proofread the final version of the manuscript.

19

20 **Introduction.** Neurovascular coupling (NVC) is the neurophysiological process that ensures active  
21 regions of the brain receive an increased local cerebral blood flow (CBF) to match the metabolic  
22 demands neuronal activity exerts. Cell types including neurons, astrocytes, endothelial cells, vascular  
23 smooth muscle cells, and pericytes are involved in the facilitation of NVC during which local blood  
24 vessels dilate (1). The vasodilation of cerebral arterioles causes an influx of oxygenated blood (HbO)  
25 coupled to a decrease in deoxyhaemoglobin (HbR), that is the source of the blood-oxygen-level-  
26 dependent (BOLD) fMRI signal (2, 3). The breakdown of NVC is thought to be an important and early  
27 pathogenic mechanism in the onset and progression of a range of neurological conditions (4).

28

29 Alzheimer's disease (AD) is the most common form of dementia worldwide, with the vast majority of  
30 cases being sporadic and occurring 65 years and over. Population based studies have shown that AD  
31 and vascular pathologies commonly coexist in the brains of elderly individuals (5-8). A major  
32 cardiovascular pathology that affects as many as up to 60% of all individuals after the age of 55 is  
33 atherosclerosis. Atherosclerosis is the progressive thickening, hardening and narrowing of major  
34 arteries, including those that supply the brain, such as the carotids (9). Intracranial atherosclerosis does  
35 not occur until much later in life, around 75 years and above. As such, Alzheimer's disease that begins  
36 around the 8<sup>th</sup> decade of life is usually present with other comorbidities such as atherosclerosis (10).  
37 There is also evidence that, not only do these often exist as comorbidities, but they may interact  
38 pathogenically with vascular disease and neurovascular unit changes contributing to AD (11, 12). To  
39 date, there are very limited models of comorbidity with respect to preclinical studies, and instead models  
40 have been very specific and 'pure', and not reflective of the clinical pathology in humans.

1 Atherosclerosis is known to be a major risk factor for the development of dementia. The progressive  
2 atheromatous plaque build-up within cerebral arteries that supply the cortex over time can lead to  
3 stenosis producing insufficient oxygen delivery to the brain parenchyma, potentially resulting in  
4 neuronal death and symptoms of dementia (1). Indeed, the vascular cognitive impairment (VCI) which  
5 precedes the onset of dementia may be attributed to a variety of different vascular pathologies affecting  
6 either systemic or intracranial vasculature (both large or small vessels) (13). Due to the complexity of  
7 atherosclerosis and dementia pathogenesis, understanding the mechanisms of their mutual interactions  
8 is necessary if efforts to develop therapeutics to prevent VCI and vascular dementia, which currently  
9 has no disease-modifying cure, are to succeed.

10

11 In the present study, we aimed to investigate neurovascular function in mid-aged (9-12m old) mice  
12 where atherosclerosis was a comorbidity. We used a novel model of atherosclerosis that utilises a  
13 single adeno-associated virus (AAV) i.v. injection of a gain of function mutation (D377Y) to proprotein  
14 convertase subtilisin/kexin type 9 (rAAV8-mPCSK9-D377Y), combined with a high-fat Western diet to  
15 induce atherosclerosis in most adult mouse strains (14, 15). This leads to the constitutively active  
16 inhibition of the LDL-receptor preventing cholesterol internalisation and degradation by hepatocytes,  
17 leading to hypercholesterolaemia to occur and the development of robust atherosclerotic lesions within  
18 6-8 weeks (14). Furthermore, in order to address the effect atherosclerosis could have on mild  
19 Alzheimer's pathology, we combined the atherosclerosis with the mild J20-hAPP mouse model of  
20 familial Alzheimer's disease (fAD) to create a mixed comorbid mouse model (J20-PCSK9-MIX). The  
21 J20-hAPP mouse model of fAD over-expresses human amyloid precursor protein (hAPP) with the  
22 Swedish (K670N and M671L) and the Indiana (V7171F) familial mutations (16), which begin to develop  
23 amyloid-beta (A $\beta$ ) plaques around 5-6 months of age, and show signs of cognitive impairments from 4  
24 months (17). We hypothesised that atherosclerosis would exacerbate Alzheimer's disease pathology in  
25 the brain and that neurovascular function would be further worsened compared to AD or ATH models  
26 alone. We have previously reported no significant alterations to evoked-haemodynamics in the J20-AD  
27 model of the same age (9-12m); however, under acute imaging sessions where an electrode was  
28 inserted into the brain, we found significantly perturbed haemodynamics (18). We hypothesised that  
29 electrode insertion causes cortical spreading depression (CSD). Based on recent data linking migraine  
30 with aura with cardiovascular disease (19), we hypothesised that experimental CSD might be  
31 heightened in all disease models. We report that experimentally induced atherosclerosis in the J20-AD  
32 model increased the number of A $\beta$  plaques by 300%. Furthermore, experimental CSD is more severe  
33 in all diseased groups compared to WT controls.

34

## 35 **Results**

36 **2D-Optical Imaging Spectroscopy (2D-OIS) Measures Brain Cortical Haemodynamics Through a**  
37 **Thinned Cranial Window.** We performed chronic imaging of the brain cortex 3-weeks post-surgery,  
38 where the thinned cranial window remained intact (Figure 1A/B), as described previously (18, 20). We  
39 deployed a range of stimulations (2s & 16s mechanical whisker stimulations) with the mouse breathing  
40 both 100% oxygen (hyperoxia) and 21% oxygen (normoxia), in addition to recording transitions between

1 conditions and performing a 10% hypercapnia test to test the maximum dilation of vessels. Each  
2 experimental day consisted of the same set of experiments with consistent timings to ensure reliability  
3 across all animal groups. First, a 2s-whisker stimulation (5Hz) with the mouse breathing 100% oxygen;  
4 hyperoxia, consisting of 30 trials, second, a 16s-whisker stimulation consisting of 15 trials. Animals  
5 were then transitioned from hyperoxia to 21% oxygen; normoxia, and the baseline haemodynamic  
6 changes were recorded. The same set of stimulations were deployed under normoxia (2s & 16s  
7 stimulations), before transitioning back to hyperoxia for a final 10% hypercapnia test. Using these  
8 stimulations, activation maps of blood volume; total haemoglobin (HbT), can be generated (Figure 1C).  
9 Mice were allowed to recover and after 1-week, a final acute imaging session was performed. In this  
10 setup, a small burr-hole was drilled through the thinned skull overlying the active region of interest (ROI)  
11 as determined from the chronic imaging sessions (Figure 1D), and a multichannel electrode was  
12 inserted into the brain (Figure 1E) to record neural activity simultaneously. We then imaged and  
13 recorded the baseline haemodynamics for a 35-minute period to observe the effect electrode insertion,  
14 before commencing the first stimulation. This was also done to record baselines on chronic imaging  
15 sessions.

16  
17  
18  
19  
20  
21

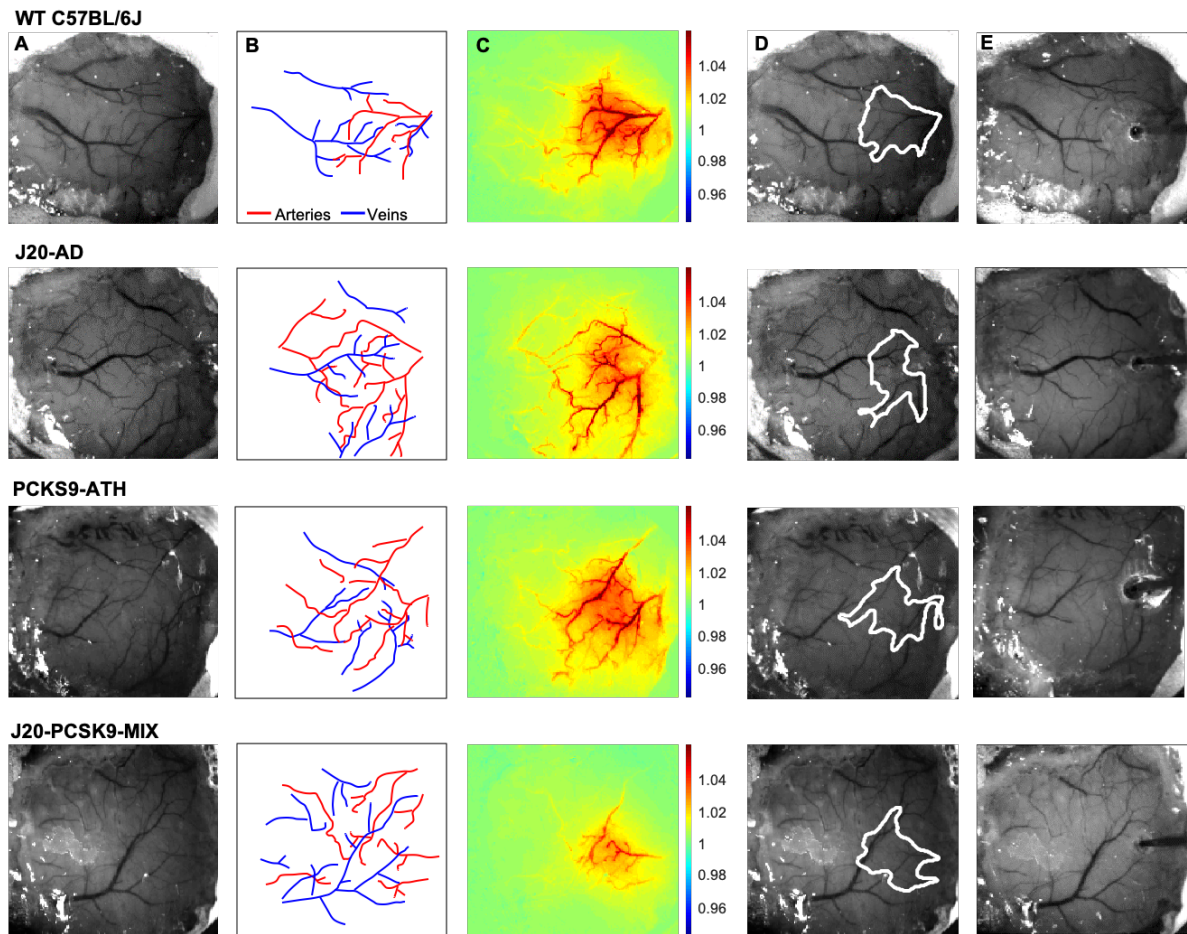

1  
2 **Fig. 1.** Experimental Setup and Data Derivation. A) Raw image of representative thinned cranial windows for WT, J20-AD,  
3 PCKS9-ATH AND J20-PCSK9-MIX mice (chronic imaging session). B) Vessel map outlining the major arteries and veins within  
4 the thinned cranial window. C) HbT spatial activation map showing fractional changes in HbT in response to a 16s-whisker  
5 stimulation. D) Automated computer-generated region of interest (ROI) determined from the HbT activation response in C from  
6 which time-series for HbT, HbO & HbR are generated. E) Raw image of the same animals in terminal acute imaging sessions  
7 with multichannel electrodes inserted into the active ROI determined from chronic imaging session.

8  
9  
10  
11  
12  
13  
14  
15  
16  
17  
18  
19  
20  
21

1 **Chronic Haemodynamic Responses in the Brain are Reduced in PCSK9-ATH Mice.** Cortical  
2 haemodynamics were imaged through a thinned cranial window to determine whether evoked cortical  
3 haemodynamics were different between 9-12m old wild-type (WT), atherosclerotic (PCSK9-ATH),  
4 Alzheimer's (J20-AD) & mixed (J20-PCSK9-MIX) mouse models (Figure 2). Across all stimulations and  
5 conditions, ATH-PCSK9 mice displayed a significant reduction of evoked blood volume responses  
6 (HbT; peak value) compared to WT controls. J20-AD mice and J20-PCSK9-MIX mice did not exhibit a  
7 significant change in HbT across all stimulation conditions compared to WT mice. Evoked HbT  
8 responses; although initially are smaller in J20-PCSK9-MIX mice, recovered to match that of J20-AD  
9 mice later in the experimental protocol under normoxia (Figure 2D). Levels of oxyhaemoglobin (HbO)  
10 were significantly reduced in PCSK9-ATH mice but showed a reduced trend in J20-PCSK9-MIX mice  
11 too. The washout of deoxyhaemoglobin (HbR) was significantly reduced in PCSK9-ATH mice compared  
12 to WT, but also showed a reduced trend across all diseased groups across all conditions compared to  
13 WT mice. All mice displayed stable and robust haemodynamic responses across the experimental  
14 protocol (Figure S2). Finally, vascular reactivity as determined by the response to 10% hypercapnia  
15 was not significantly different between any of the diseased groups (Figure S3).  
16  
17  
18  
19

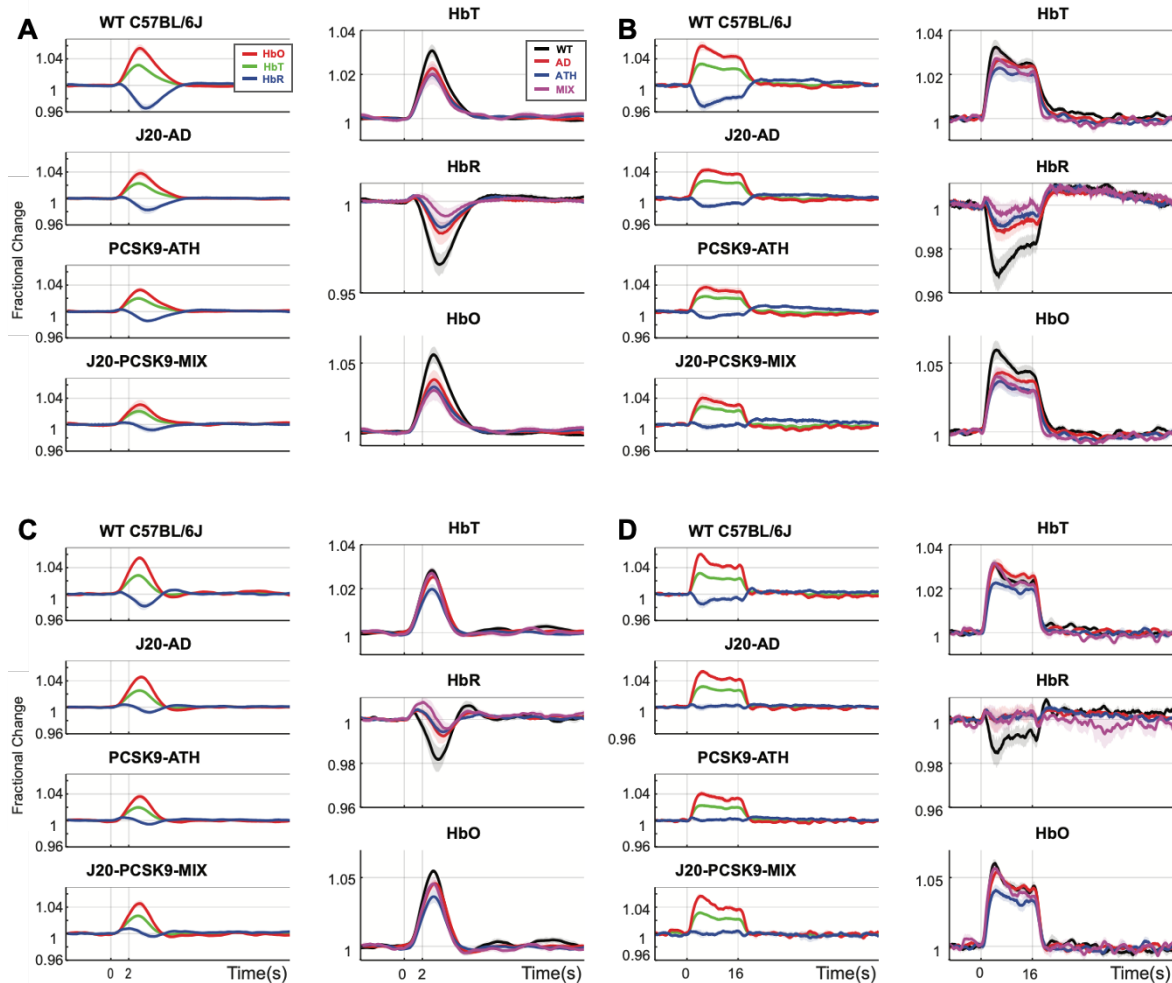

1  
2  
3  
4  
5  
6  
7  
8  
9  
10  
11  
12  
13  
14  
15  
16  
17  
18  
19  
20  
21  
22

**Fig 2.** Fractional Changes in Chronic Stimulus-Evoked (Peak) Haemodynamic Responses. A) 2s-stimulation in 100% oxygen. B) 16s-stimulation in 100% oxygen. C) 2s-stimulation in 21% oxygen. D) 16s-stimulation in 21% oxygen. All animals aged 9-12m: WT (n=6), J20-AD (n=9), PCSK9-ATH (n=8), J20-PCSK9-MIX (n=6). **HbT:** There was no significant overall effect of disease  $F(3,25)=2.83$ ,  $p=0.059$ . However, Dunnett's (two-sided) multiple comparisons test revealed there was a significant difference between WT and ATH ( $p=0.023$ ). As expected, there was a significant effect of experiment,  $F(1.65,41.14)=13.64$ ,  $p<0.001$ . There was also no significant interaction effect between experiment and disease,  $F(4.94,41.14)=1.50$ ,  $p=0.211$ . **HbO:** There was a significant overall effect of disease  $F(3,25)=4.84$ ,  $p=0.009$ . Dunnett's (two-sided) multiple comparisons test revealed there was a significant difference between WT and ATH ( $p=0.002$ ). There was a significant effect of experiment,  $F(1.47,36.72)=15.348$ ,  $p<0.001$ . There was no significant interaction effect between experiment and disease,  $F(4.41,36.72)=1.64$ ,  $p=0.181$ . **HbR:** There was a significant overall effect of disease  $F(3,25)=4.86$ ,  $p=0.008$ . Games-Howell multiple comparisons reveal HbR peak is significantly different for WT vs ATH ( $p=0.040$ ). There was a significant effect of experiment,  $F(1.69,42.28)=17.33$ ,  $p<0.001$ . There was a significant interaction between experiment and disease interaction:  $F(5.07, 42.28)=3.19$ ,  $p=0.015$ . All error bars (lightly shaded) are  $\pm$ SEM. Vertical dotted lines indicate start and end of stimulations.

1 **CSD is Worse in Diseased Animals and Impacts Haemodynamic Recovery to Baseline.** 1-week  
2 after recovery from the chronic imaging protocol, an acute imaging experiment was performed wherein  
3 a small-burr hole was drilled into the skull overlying the active region (determined from HbT responses  
4 from chronic experiments) and a microelectrode was inserted into the brain to a depth of 1500-1600 $\mu$ m  
5 to obtain neural electrophysiology data in combination with the imaging of cortical haemodynamics by  
6 2D-OIS. Electrode insertion into the brain resulted in a wave of haemodynamic changes that occurred  
7 in all mice (CSD) (Figure 3). In WT mice, electrode insertion led to a small decrease in HbT  
8 (vasoconstriction) followed by a robust HbT bounce back (vasodilation), immediately followed by a small  
9 sustained vasoconstriction (reduced HbT) that persisted for some time (Figure 3A-top). In J20-AD mice,  
10 electrode insertion caused a large vasoconstriction to occur which spread across the cortex in a strong  
11 wave of vasoconstriction that was followed by a very small attempted recovery. This was masked by a  
12 large sustained and prolonged vasoconstriction of contiguous vessels that persisted for some time  
13 (Figure 3A-bottom). The largest vasoconstriction post-CSD occurred in J20-AD mice, followed by  
14 PCSK9-ATH mice, then J20-PCSK9-MIX mice compared to WT controls. The smallest of all CSD  
15 occurred in WT mice (Figure 3B). A prolonged and sustained constriction below baseline persisted in  
16 all mice post-CSD, however, this effect was recovered to baseline in WT mice during the first stimulation  
17 experiment 35 minutes after the CSD occurred (Figure 3B). In all disease mouse models, the  
18 constriction below baseline was more severe and persisted for a much longer time with a slower  
19 haemodynamic recovery. Following CSD, stimulation-evoked haemodynamic changes were not  
20 significantly different in any of the diseased groups overall, although they were initially smaller in the  
21 first two stimulations for PCSK9-ATH mice (Figure S1).



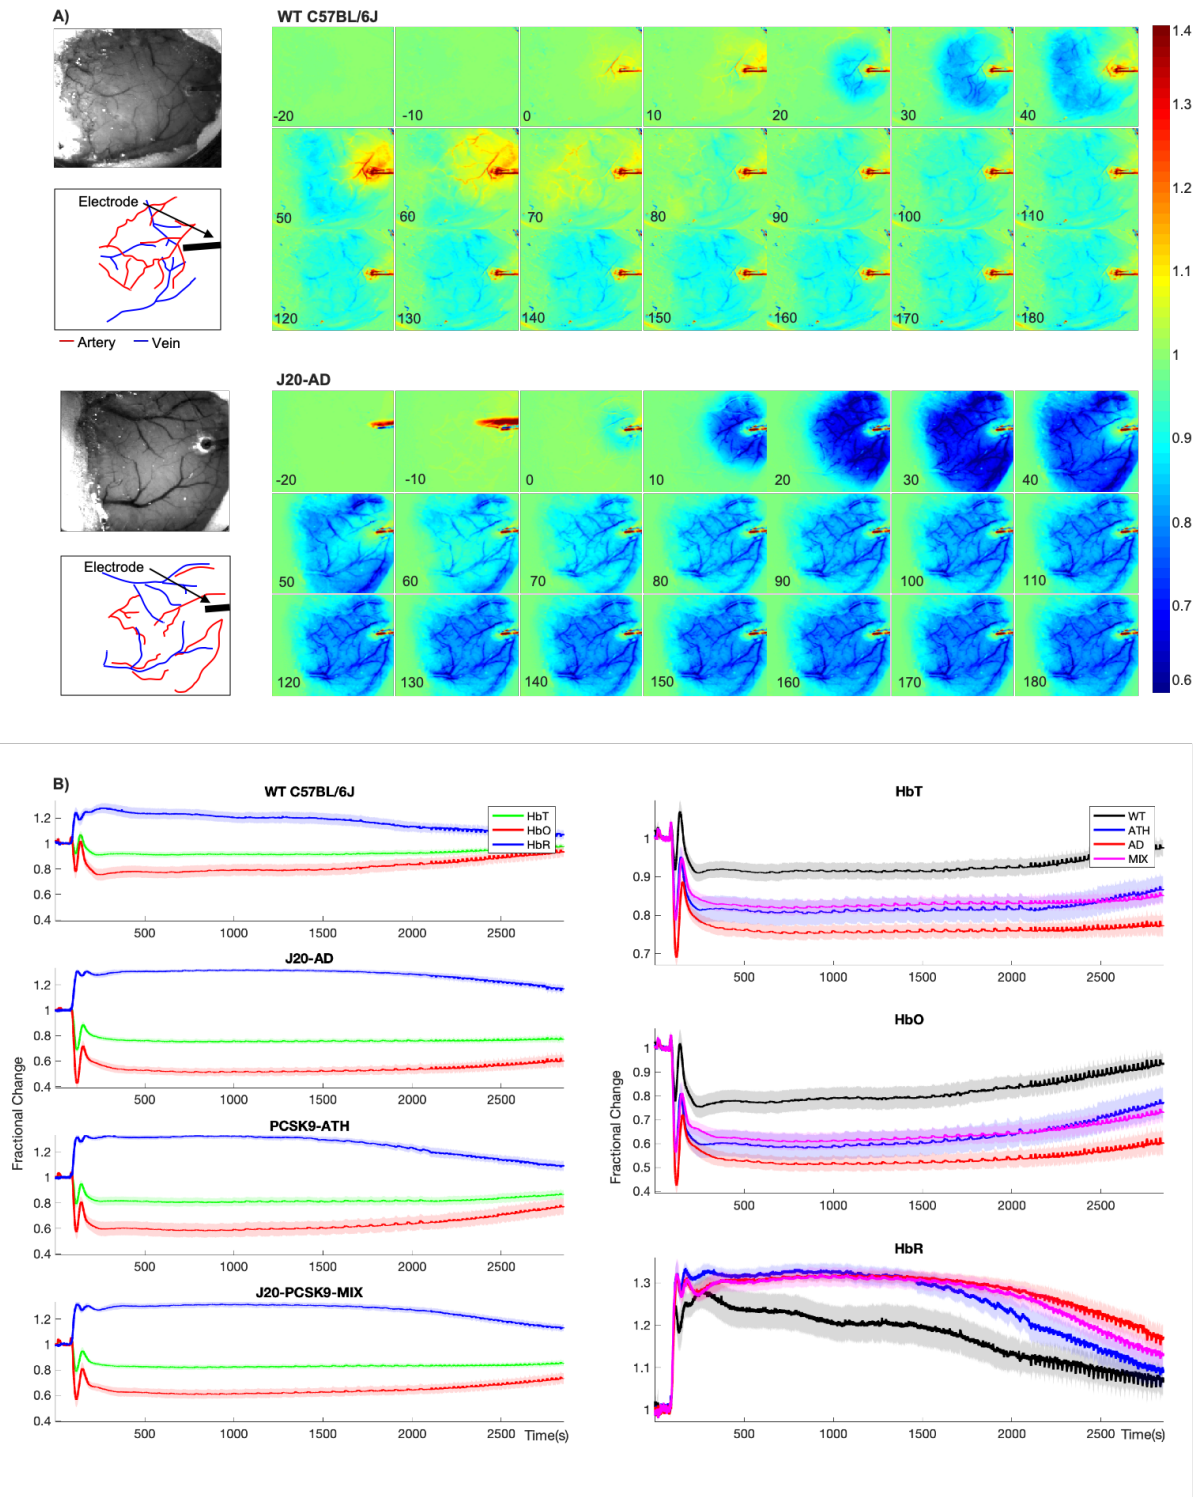

1  
2 **Fig 3.** Cortical Spreading Depression (CSD) in WT, diseased and comorbid animals. A) Representative montage time-series of  
3 WT and J20-AD mice showing HbT changes post-electrode insertion. Colour bar represents fractional changes in HbT from  
4 baseline. B) *Left:* Average CSD haemodynamics profiles for control animals (WT C57BL/6J & nNOS-ChR2) (n=7), J20-AD (n=7),  
5 PCSK9-ATH (n=5) & J20-PCSK9-MIX (n=6) mice. *Right:* Averaged changes to HbT (top), HbO (middle) & HbR (bottom) upon  
6 CSD in the different mouse groups compared to WT. **HbT:** A 1-way ANOVA showed significant effect of disease for HbT  
7 ( $F(3,21)=9.62$ ,  $p=0.001$ ). Dunnett's 2-sided multiple comparisons showed that AD vs WT  $p<0.001$ , ATH vs WT  $p=0.012$  & MIX vs  
8 WT  $p=0.020$ . **HbO:** 1-way ANOVA showed significant effect of disease for HbO ( $F(3,21)=8.51$ ,  $p<0.001$ ). Dunnett's 2-sided  
9 multiple comparisons showed that AD vs WT  $p<0.001$ , ATH vs WT  $p=0.01$  & MIX vs WT  $p=0.017$ . **HbR:** Kruskal-Wallis test  
10 revealed no significant effect of disease  $H(3)=6.58$ ,  $p=0.087$ . All error bars (lightly shaded) are  $\pm$ SEM.

1 **Stimulus-Evoked Neural Activity is Not Significantly Altered in Any Disease Groups Compared**  
2 **to WT Mice.** In the final imaging session and after a 35-minute period of recovery post-electrode  
3 insertion, the first experimental stimulation was performed (2s-stimulation in 100% oxygen) where  
4 evoked cortical haemodynamics were imaged simultaneously with the recording of neural multi-unit  
5 activity (MUA). Evoked-MUA response were not significantly different in any of the diseased groups  
6 compared to WT mice (Figure 4), suggesting that the significantly different evoked-HbT in PCSK9-ATH  
7 mice (observed on chronic imaging sessions) was due to neurovascular breakdown. Initially, the MUA  
8 was slightly lower for J20-AD, PCSK9-ATH & J20-PCSK9-MIX mice compared to WT mice (Figure 4A),  
9 however, later in the experimental session by the last stimulation, there was no observable difference  
10 in MUA between any of the groups (Figure 4D). Thus, this suggests that the neural MUA was initially  
11 smaller after the CSD had occurred, however, recovered fully with time. The haemodynamic responses  
12 in the acute experimental session were not significantly different across all stimulations for any of the  
13 diseased groups.  
14

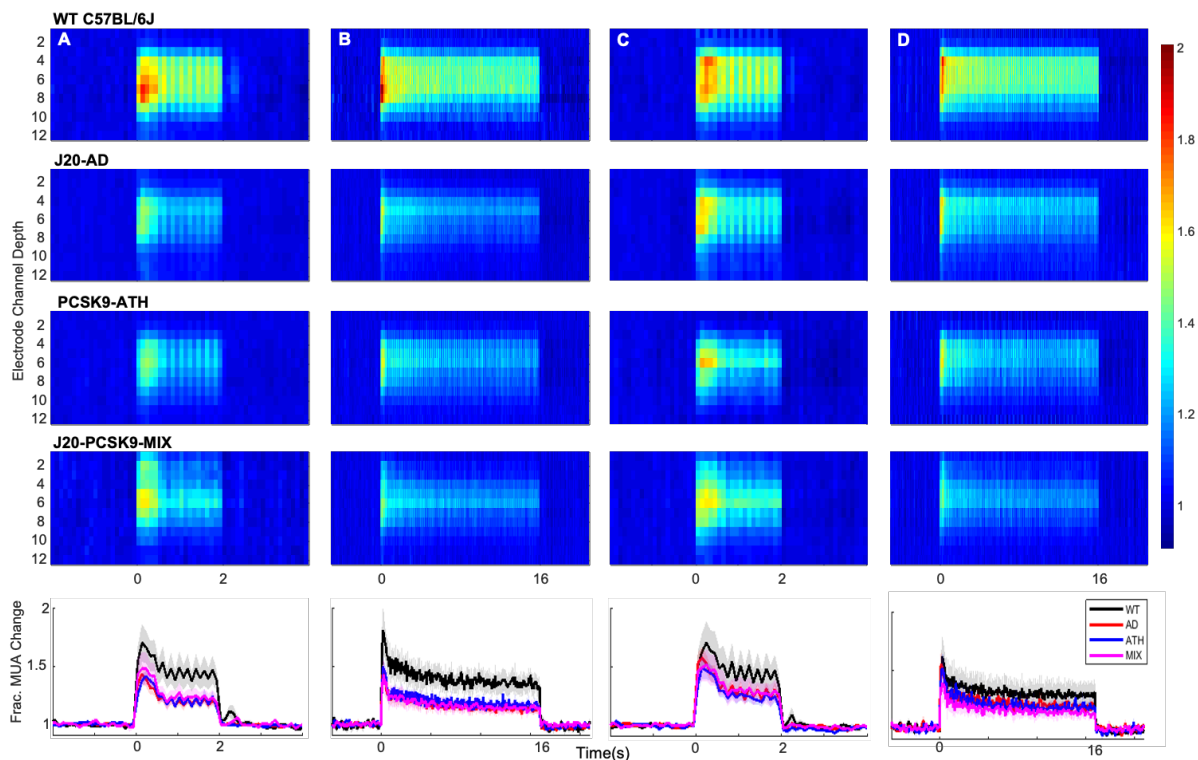

15  
16 **Fig 4.** Evoked Neural Multi-Unit Activity (MUA) Responses; MUA heat maps showing fractional changes in MUA along the depth  
17 of the cortex (channels 4-8) in response to stimulations in WT C57BL/6J (n=6), J20-AD (n=9), PCSK9-ATH (n=7) & J20-PCSK9-  
18 MIX (n=6) mice. Overall effect of disease on MUA  $F(3,24)=2.24$ ,  $p=0.109$  (2-way mixed design ANOVA). There was a significant  
19 effect of experiment, as expected,  $F(2.26, 54.16)=6.83$ ,  $p=0.002$ . There was no significant interaction between experiment and  
20 disease  $F(6.77, 54.16)=0.70$ ,  $p=0.670$ . All error bars (lightly shaded) are  $\pm$ SEM.  
21  
22  
23  
24  
25

1 **Increased Number of Hippocampal A $\beta$  Plaques in J20-PCSK9-MIX Mice. Increased**  
2 **Neuroinflammation in J20-AD and PCSK9-ATH Mice.** Immunohistochemistry was performed on J20-  
3 AD and J20-PCSK9-MIX mice to assess whether there were any specific differences in AD  
4 neuropathology changes. Staining was performed for A $\beta$  plaques and these were quantified within the  
5 hippocampus and the cortex. A $\beta$  plaques were significantly increased by 3-fold in the hippocampi of  
6 J20-PCSK9-MIX mice compared to J20-AD mice (Figure 5A/B). Within the cortex, there was no  
7 significant difference in A $\beta$  plaques between the 2 groups (data not shown). Next, neuroinflammation  
8 was assessed by qRT-PCR for 2 key inflammatory markers: interleukin-1 $\beta$  (IL1 $\beta$ ) and tumour necrosis  
9 factor- $\alpha$  (TNF $\alpha$ ) to assess the degree of neuroinflammation present globally within the brain. IL1 $\beta$   
10 mRNA was significantly upregulated in J20-AD and PCSK9-ATH mice (Figure 5C). TNF $\alpha$  mRNA was  
11 significantly upregulated in PCSK9-ATH mice only (Figure 5D). J20-PCSK9-MIX mice displayed the  
12 lowest inflammatory changes in IL1 $\beta$  & TNF $\alpha$  compared to the other diseased groups, though this was  
13 still higher than WT mice.  
14

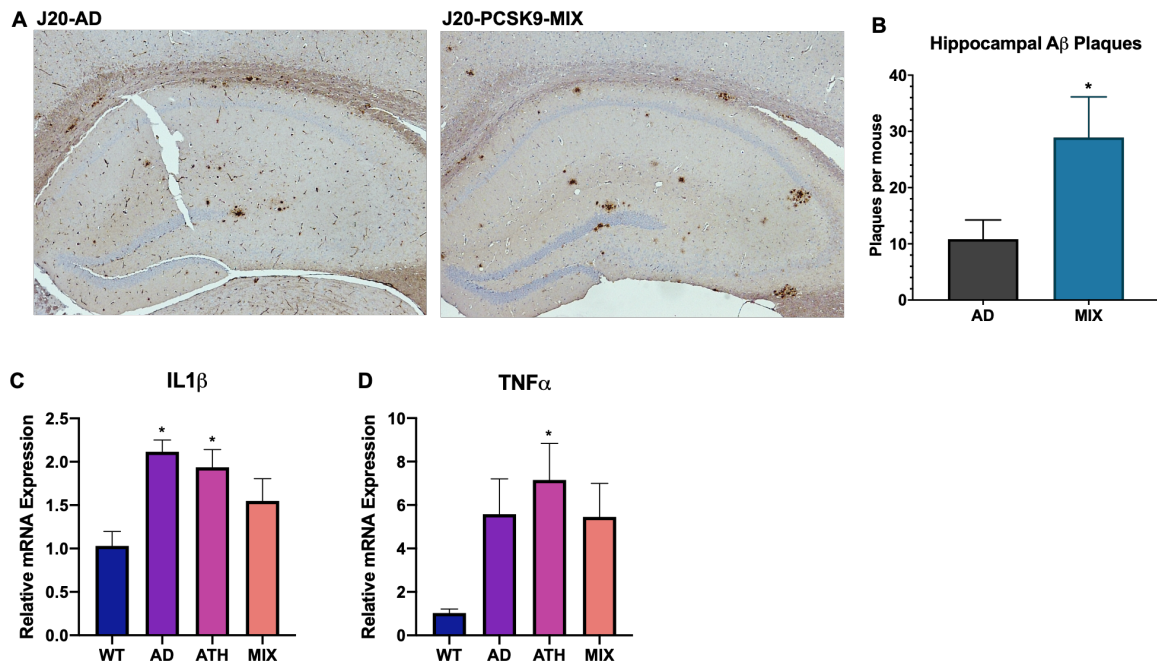

15  
16 **Fig 5.** Neuropathology and Neuroinflammation. A) Representative histological coronal hippocampal sections for J20-AD and J20-  
17 PCSK9-MIX mice stained with anti-A $\beta$  to visualise A $\beta$  plaques. B) Increased number of amyloid-beta plaques in the hippocampus  
18 of J20-PCSK9-MIX mice compared to J20-AD mice ( $p=0.036$ ; unpaired t-test) ( $n=4$  each). Cortical plaques  $p=0.3372$  (data not  
19 shown). D) qRT-PCR for 1L1 $\beta$ : AD vs WT  $p=0.011$ , ATH vs WT  $p=0.0278$ , MIX vs WT  $p=0.218$  (1-way ANOVA with post-hoc  
20 Dunnett's multiple comparisons test). E) qRT-PCR for TNF $\alpha$ : AD vs WT  $p=0.1197$ , ATH vs WT  $p=0.0370$ , MIX vs WT  $p=0.1313$   
21 with post-hoc Dunnett's multiple comparisons test. All error bars are  $\pm$ SEM.

22  
23  
24  
25  
26  
27  
28

## 1 Discussion

2 The present study investigated neurovascular function in a novel experimental model of ATH (PCSK9-  
3 ATH) and for the first time, in a comorbid setting whereby ATH was experimentally induced in a well  
4 characterised model of AD; J20-hAPP(Sw,Ind), to create a mixed comorbid model (J20-PCSK9-MIX).  
5 These mice were compared to age-matched (9-12m) WT C57BL/6J controls, and J20-AD mice. Given  
6 that systemic ATH is a major risk factor for dementia, the mechanisms underpinning the relationship  
7 between ATH, neurovascular decline and dementia are still largely unclear. In the study, we utilised a  
8 chronic mouse preparation to image cortical haemodynamics through an intact skull surface, followed  
9 by an acute terminal imaging session where the skull was drilled, and the brain penetrated with a  
10 multichannel electrode. In our experimental paradigm, we deployed a range of stimulations (both short  
11 2s and long 16s durations) and different respiratory conditions (hyperoxia & normoxia) to assess  
12 neurovascular coupling to mechanical whisker stimulations, in addition to measuring neural activity  
13 within the active region defined from the chronic imaging.

14  
15 In the first part of the study, we characterised evoked-haemodynamic responses using a chronic skull-  
16 intact & surgery-recovered mouse preparation. We found that PCSK9-ATH mice displayed significantly  
17 reduced evoked blood volume (HbT) responses, in addition to reduced levels of oxyhaemoglobin (HbO)  
18 and notably, an impaired washout of deoxyhaemoglobin (HbR) across all stimulations and conditions.  
19 The J20-PCSK9-MIX mice did not display a significant reduction in HbT, nor in HbO or HbR levels. With  
20 respect to J20-AD mice, we did not observe any significant alterations to HbT as previously published  
21 (18). Another important finding from the present study was that 10%-hypercapnia responses were not  
22 significantly different in any of the mice compared to WT controls (Figure S3), thus suggesting that  
23 vascular reactivity was not impaired in any of the mice, indicating that cerebral arterioles were  
24 unaffected by atherosclerosis at this time-point (9-12m). Thus, the basis of reduced HbT in PCSK9-  
25 ATH mice cannot be attributed to intracranial atherosclerosis. Previous work examining experimental  
26 atherosclerosis in the ApoE<sup>-/-</sup> model of ATH only showed extravascular lipid pools in large ventricle-  
27 associated and parenchymal blood vessels (21). Other work has found hypercapnia differences in the  
28 ApoE<sup>-/-</sup> model (22), however, this may be due to the severity differences in the mouse models where  
29 ApoE<sup>-/-</sup> is more severe compared to PCSK9-mice which resemble more closely the milder and more  
30 'human-like' LDLR<sup>-/-</sup> model.

31  
32 In the second part of the study, we obtained neural multi-unit activity (MUA) by inserting a multichannel  
33 electrode into the active region defined from the chronic imaging experiments. In order to do this, we  
34 carefully drilled a small burr-hole without penetrating the dura, followed by a gentle insertion of the  
35 electrode into the brain whilst simultaneously recording the baseline haemodynamics by 2D-OIS. As  
36 we showed in our previous reports (18, 20), the technical procedure of electrode insertion causes a  
37 cortical spreading depression (CSD) to occur in all animals. Here, we describe the CSD and its recovery  
38 on the different disease groups. CSD has two distinct phases: 1) a wave of depolarisation within the  
39 grey matter characterised by neuronal distortion leading to a large change of the membrane potential  
40 whereby neuronal activity is silenced (spreading depression) & 2) haemodynamic changes that

1 accompany neuronal spreading depolarisation which typically result in a wave of prolonged reduced  
2 perfusion that persists for some time (23, 24). CSD does not typically occur in healthy brain tissue,  
3 however, it is a common neurophysiological occurrence in certain pathological conditions including  
4 migraine, epilepsy, brain injury, hyperthermia, chemically induced neurotoxicity, hypoxia & ischaemia  
5 (24). In WT mice, the initial constriction wave is small, and a robust haemodynamic recovery occurs  
6 which allows for neurovascular coupling to occur to sustain neurons metabolically. Although WT mice  
7 exhibit a slight constriction below baseline, levels of HbO and HbR are not greatly affected, thus  
8 suggesting that CSD in WT mice does not result in severe hypoxia or ischaemia. This is a marked  
9 difference to the diseased animals, which upon electrode insertion to cause a CSD, exhibit profound  
10 vasoconstriction with an extremely limited haemodynamic recovery resulting in a prolonged constriction,  
11 severe reductions to blood volume and HbO & HbR levels indicating profound hypoxia and ischaemia.  
12 Thus, the haemodynamic response to CSD in diseased mice is severely inappropriate and can lead to  
13 long lasting devastating effects such as widespread cortical pannecrosis of neurons and astrocytes  
14 (24). As our data shows, baseline blood volumes do not recover in the diseased animals for a much  
15 longer period compared to WT animals, with the most profound CSD occurring in J20-AD mice, followed  
16 by PCSK9-ATH mice. The least severe CSD of the disease groups occurs in the J20-PCSK9-MIX  
17 animals. This surprising effect may be related to the levels of neuroinflammation within the brain (see  
18 below).

19  
20 CSD is a reflection of whole brain state and disease burden effects, such as global neuroinflammation  
21 and in relation to certain pathologies including migraines or TBI, especially in the context of pre-existing  
22 disease (24). CSD may be the neuropathological link between migraine, stroke, cardiovascular disease  
23 and dementia in which cardiovascular risk factors, genetics and other lifestyle factors which prime the  
24 onset of migraine to occur lead to vascular vulnerability within the brain predisposing affected  
25 individuals to an increased risk of cerebral ischaemia and haemorrhagic stroke (25). There is  
26 accumulating evidence to suggest that shared genetic and associated clinical features observed in  
27 migraine patients are involved in the increased vulnerability to cerebral ischaemia, therefore,  
28 predisposing affected individuals to stroke and white matter lesions associated with dementia (26). The  
29 underlying mechanism being CSD; the neurophysiological feature of aura in migraines, whose induction  
30 threshold can be reduced by genetic mutations and systemic comorbidities that contribute to vascular  
31 dysfunction and neuroinflammation (26). Indeed, mouse models of cerebral autosomal dominant  
32 arteriopathy with subcortical infarcts and leukoencephalopathy syndrome (CADASIL); a genetic  
33 cerebrovascular disease caused by *NOTCH3* mutations that has a high frequency of migraines with  
34 aura, have enhanced CSD linking a dysfunctional neurovascular unit with migraine with aura (27).  
35 Furthermore, a recent study examined women who suffered from migraines with and without aura and  
36 found that those that suffered migraines with aura had a higher incidence rate of cardiovascular disease  
37 compared to women without aura or any migraines (19). In addition, another recent study found that  
38 migraine history was positively associated with an increased risk of developing both all-cause dementia  
39 and AD, but not VaD (28). Our study, along with the previously discussed studies provide an explanation  
40 for these recent findings and highlights how systemic disease can prime the brain to allow profound

1 CSDs to occur in the context of migraine, and as such, migraine frequency and intensity may be related  
2 to the onset of neurological disease by later in life including dementia. CSD is not limited to migraines,  
3 but also suggests that those with cardiovascular disease or genetic mutations that suffer a brain injury  
4 may also suffer from worse effects due to increased severity of CSD, as modelled in our experimental  
5 protocol by electrode insertion. CSD may also be an effective and robust biomarker to assess brain  
6 states as well as testing the efficacy of therapies in both preclinical studies and in neurological patients.

7  
8 Surprisingly, neural MUA data was not significantly altered across any of the stimulations or conditions  
9 for any of the disease groups compared to WT controls. Although the MUA for J20-AD, PCSK9-ATH &  
10 J20-PCSK9-MIX mice does appear to be smaller in the first stimulation (Figure 4), it was not significant  
11 after post-hoc tests were performed. Furthermore, this effect disappears under the normoxia conditions  
12 (in 21% oxygen) where there is no longer such an indicative difference. The similar MUA across all  
13 groups, coupled with impaired HbO & HbR levels in PCSK9-ATH mice, and to some extent in the other  
14 disease models may indicate that neurovascular coupling is inefficient and metabolically compromised.  
15 A consistent finding irrespective of stimulation and condition was that PCSK9-ATH mice display  
16 consistently reduced evoked-HbT responses (observed in chronic experiments) compared to WT  
17 controls, which suggests an advanced level of neurovascular breakdown and inefficiency. Other groups  
18 have found similarly reduced blood flow in the ApoE<sup>-/-</sup> model without altered cortical activation, however,  
19 unlike in the present study, reduced hypercapnia response (22). A recent study found decreased tissue  
20 oxygenation in the LDLR<sup>-/-</sup> mouse model of atherosclerosis (29), and this is most likely to be the case  
21 in the PCSK9 model. This is also the case for the J20-AD and J20-PCSK9-MIX mice which also display  
22 a trend towards reduced HbR washout which suggests that although neurovascular coupling is still  
23 present in these mice, it could be less efficient resulting in inadequate oxygen delivery to active neurons.  
24 PCSK9-ATH mice on the other hand display reduced evoked-HbT to normal levels of cortical activation  
25 in addition to reduced HbR washout indicating neurovascular breakdown and metabolic inefficiency.

26  
27 A question that arises is why the J20-PCSK9-MIX mice HbT responses are not more severely impaired  
28 than J20-AD and PCSK9-ATH? There may be redundancies that occur physiologically to compensate  
29 for mild hypoxia in the brain, such as the possible angiogenesis within the brain. Angiogenesis is known  
30 to be triggered in cerebral microvessels in AD in response to increased A $\beta$  and neuroinflammation and  
31 may initially reflect a compensatory mechanism to increase perfusion (30). However,  
32 neovascularisation in AD is eventually thought to be pathogenic and damaging to the brain due to  
33 enhanced endothelial A $\beta$  secretion that leads to increased ROS and endothelial damage (30). In  
34 addition, the levels of neuroinflammation seen in these mice may be due to an altered disease-course  
35 and examining temporospatial expression may reveal much higher levels of inflammation in this mixed  
36 model at an earlier time-point. Other markers of inflammation may be upregulated compared to those  
37 that we assessed, and future studies would incorporate transcriptomic approaches to identify other  
38 mechanisms or markers. Nevertheless, a key translational finding from our study was that J20-PCSK9-  
39 MIX mice displayed a significant increase in the number of hippocampal plaques, and this confirms  
40 other studies that have used APP/PS1 mice (31). However, the number of cortical plaques were not

1 significantly increased between J20-AD and J20-PCSK9-MIX mice, again confirming findings from the  
2 previously discussed study (31). Furthermore, other research has found that high-fat diet in APP/PS1  
3 double transgenic mouse model of AD is able to increase neuropathological changes as well as worsen  
4 behavioural abnormalities, however, without any further alterations to CBF (32), as seen in our study.  
5 Our neurovascular data focuses on the cortex, and we do not see worsened responses in J20-PCSK9-  
6 MIX mice compared to J20-AD (or PCSK9-ATH) mice potentially reflecting the similar number of  
7 amyloid-plaques in the cortex. It is plausible that neurovascular coupling in the hippocampus in J20-  
8 PCSK9-MIX may be more perturbed than in J20-AD and PCSK9-ATH, however, our imaging system  
9 does not allow for us to image the hippocampus *in vivo*. We can also hypothesise that inducing  
10 atherosclerosis in a more moderate or severe fAD model such as the APP/PS1 or 5xfAD could worsen  
11 neurovascular coupling and neuropathological and neuroinflammation changes compared to the very  
12 mild J20-AD model that we have used. In the more extreme setting, neurovascular function may be  
13 severely perturbed and dysfunctional reflecting the later disease-course in humans, whereas the J20-  
14 AD model reflects a midlife stage.

15  
16 There are several notable limitations with the present study. Firstly, all imaging was performed on lightly  
17 anaesthetised animals, which is known to compromise neurovascular function (33). However, previous  
18 research from our laboratory has developed an anaesthetic regimen that is comparable to awake  
19 imaging in terms of the haemodynamic responses to physiological whisker stimulation with little effect  
20 on vascular reactivity (34). The benefits of lightly anaesthetised preparations over awake preparations  
21 is that we can avoid the multiple considerations of behavioural state in which the animals may be  
22 whisking, grooming as well as their arousal and stress states which may be present in awake animals.  
23 Furthermore, we report the stability and robustness of our imaging preparation in this study. We present  
24 the average of all the raw stimulation trials from each animal across the whole experimental session  
25 (Figure S2), showing the stability and robustness of our preparation, as well as easily identifying any  
26 changes. Secondly, our imaging analysis assumes O<sub>2</sub> saturation to be 70% with a baseline  
27 haemoglobin concentration of 100µM. This may be important if the assumed baselines are different in  
28 the diseased animals compared to WT controls; however, our recent study (18) using the same J20-  
29 AD mouse model discussed this issue in detail, in which we showed that regardless of the baseline  
30 blood volume estimation used, our percentage change was scaled by it (i.e. always the same change).  
31 Therefore, the observations in this paper with respect to the different diseased animals are robust.  
32 Finally, we only performed qRT-PCR for 2 inflammatory targets, whereas performing RNA-seq on  
33 specific cell types or wider transcriptomic studies would allow us to investigate the expression of other  
34 inflammatory targets and cellular pathways that could be important. In addition, examining levels of  
35 circulating plasma and CSF cytokines may be useful in examining neuroinflammatory changes in these  
36 mice.

37  
38 In conclusion, we report novel findings of impaired neurovascular function in a novel experimental  
39 model of atherosclerosis (PCSK9-ATH) characterised by reduced stimulus-evoked blood volume  
40 without any significant alterations to evoked neural activity. We induced atherosclerosis in a mild fAD

1 model (J20-AD) to create a mixed comorbid model (J20-PCSK9-ATH) in which we report a significant  
2 increase in the number of hippocampal A $\beta$  plaques, however, without any significant changes to evoked  
3 haemodynamic or neural responses compared to WT or J20-AD mice. A key finding from this study  
4 was CSD was more severe in diseased animals. This may reflect the global inflammatory state of the  
5 brain and could also serve to be an effective preclinical and human clinical biomarker for baseline state  
6 and to assess therapies. Future studies should include assessment of other inflammatory markers and  
7 cellular pathway changes by a genome wide transcriptomics approach from single cell populations, as  
8 well as from sera and CSF. It would also be prudent to induce atherosclerosis in a more severe fAD  
9 model to provide a severity continuum of mixed models that reflect clinical presentations of dementia.

10

## 11 **Materials & Methods**

12 **Animals.** All animal procedures were performed with approval from the UK Home Office in accordance  
13 to the guidelines and regulations of the Animal (Scientific Procedures) Act 1986 and were approved by  
14 the University of Sheffield ethical review and licensing committee. Male C57BL/6J mice were injected  
15 i.v at 6wks with  $6 \times 10^{12}$  virus molecules/ml rAAV8-mPCSK9-D377Y (Vector Core, Chapel Hill, NC) and  
16 fed a Western diet (21% fat, 0.15% cholesterol, 0.03% cholate, 0.296% sodium; #829100, Special Diet  
17 Services UK) for 8m (PCSK9-ATH). These mice were compared to age-matched wild-type C57BL/6J  
18 mice (with no AAV injection fed normal rodent chow) that were used as controls (WT C57BL/6J). In  
19 addition, male heterozygous transgenic J20-hAPP B6.Cg-Zbtb20Tg(PDGF-  
20 APPSwInd)20Lms/2Mmjax) (MMRRC Stock No: 34836-JAX) mice were used. Atherosclerosis was  
21 induced in J20-hAPP mice alongside WT mice at 6wks of age combined with a Western diet to create  
22 a comorbid mixed model (J20-PCSK9-MIX). For the CSD imaging experiments, 4 nNOS-ChR2 mice  
23 (M/F, 16-40 weeks old) were included in the WT group. [nNOS-ChR2 mice: heterozygous nNOS-CreER  
24 (Jax 014541, (35)) x homozygous Ai32 mice (Jax 024109, (36)), given tamoxifen (100mg/kg, i.p., 3  
25 injections over 5 days) at 1-2 months old]. All mice were imaged between 9-12m of age. All mice were  
26 housed in a 12hr dark/light cycle at a temperature of 23C, with food and water supplied *ad-libitum*.

27

28 **Thinned Cranial Window Surgery.** Mice were anaesthetised with 7ml/kg i.p. injection of fentanyl-  
29 fluanisone (Hypnorm, Vetapharm Ltd), midazolam (Hypnovel, Roche Ltd) and maintained in a surgical  
30 anaesthetic plane by inhalation of isoflurane (0.6-0.8% in 1L/min O<sub>2</sub>). Core body temperature was  
31 maintained at 37°C through use of a homeothermic blanket (Harvard Apparatus) and rectal temperature  
32 monitoring. Mice were placed in a stereotaxic frame (Kopf Instruments, US) and the bone overlying the  
33 right somatosensory cortex was thinned forming a thinned cranial optical window. A thin layer of clear  
34 cyanoacrylate glue was applied over the cranial window to reinforce the window. Dental cement was  
35 applied around the window to which a metal head-plate was chronically attached. All mice were given  
36 3 weeks to recover before the first imaging session.

37

38 **2D-Optical Imaging Spectroscopy (2D-OIS).** 2D-OIS measures changes in cortical haemodynamics:  
39 total haemoglobin (HbT), oxyhaemoglobin (HbO) and deoxyhaemoglobin (HbR) concentrations (37).  
40 Mice were lightly sedated and placed into a stereotaxic frame. Sedation was induced as described



1 above and maintained using low levels of isoflurane (0.3-0.6%). For imaging, the right somatosensory  
2 cortex was illuminated using 4 different wavelengths of light appropriate to the absorption profiles of the  
3 differing haemoglobin states (495nm  $\pm$  31, 559nm  $\pm$  16, 575nm  $\pm$  14 & 587nm  $\pm$  9) using a Lambda  
4 DG-4 high-speed galvanometer (Sutter Instrument Company, US). A Dalsa 1M60 CCD camera was  
5 used to capture the re-emitted light from the cortical surface. All spatial images recorded from the re-  
6 emitted light underwent spectral analysis based on the path length scaling algorithm (PLSA) as  
7 described previously (37, 38). which uses a modified Beer-Lambert law with a path light correction  
8 factor converting detected attenuation from the re-emitted light with a predicted absorption value.  
9 Relative HbT, HbR and HbO concentration estimates were generated from baseline values in which  
10 the concentration of haemoglobin in the tissue was assumed to be 100 $\mu$ M and O<sub>2</sub> saturation to be 70%.  
11 For the stimulation experiments, whiskers were mechanically deflected for a 2s-duration and a 16s-  
12 duration at 5Hz using a plastic T-shaped stimulator which caused a 1cm deflection of the left-whisker.  
13 Each individual experiment consisted of 30 stimulation trials (for 2s) and 15 stimulation trials (for 16s)  
14 of which a mean trial was generated after spectral analysis of 2D-OIS. Stimulations were performed  
15 with the mouse breathing in 100% O<sub>2</sub> or 21% O<sub>2</sub>, and a gas transition to medical air (21% O<sub>2</sub>) as well  
16 as an additional 10% CO<sub>2</sub>-hypercapnia test of vascular reactivity.

17

18 **Neural Electrophysiology.** Simultaneous measures of neural activity alongside 2D-OIS were  
19 performed in a final acute imaging session 1-week after the 1st imaging session. A small burr-hole was  
20 drilled through the skull overlying the active region (as defined by the biggest HbT changes from 2D-  
21 OIS imaging) and a 16-channel microelectrode (100 $\mu$ m spacing, 1.5-2.7M $\Omega$  impedance, site area  
22 177 $\mu$ m<sup>2</sup>) (NeuroNexus Technologies, USA) was inserted into the whisker barrel cortex to a depth of  
23 ~1500 $\mu$ m. The microelectrode was connected to a TDT preamplifier and a TDT data acquisition device  
24 (Medusa BioAmp/RZ5, TDT, USA). Multi-unit analysis (MUA) was performed on the data. All channels  
25 were depth aligned to ensure we had twelve electrodes covering the depth of the cortex in each animal.  
26 The data were high passed filtered above 300Hz to remove all low frequency components and split into  
27 100ms temporal bins. Within each bin any data crossing a threshold of 1.5SD above the mean baseline  
28 was counted and the results presented in the form of fractional changes to MUA.

29

30 **Region Analysis.** Analysis was performed using MATLAB (MathWorks). An automated region of  
31 interest (ROI) was selected using the stimulation data from spatial maps generated using 2D-OIS. The  
32 threshold for a pixel to be included within the ROI was set at 1.5xSD, therefore the automated ROI for  
33 each session per animal represents the area of the cortex with the largest haemodynamic response,  
34 as determined by the HbT. For each experiment, the response across all pixels within the ROI was  
35 averaged and used to generate a time-series of the haemodynamic response against time.

36

37 **Statistical Analysis.** Statistical analyses were performed using SPSS v25 & GraphPad Prism v8.  
38 Shapiro-Wilks test was used to check for normality and Levene's test was used to assess equality of  
39 variances. 2-way mixed design ANOVA, 1-way ANOVA or Kruskal-Wallis tests were used, as  
40 appropriate. For 1-way ANOVA, if variances were unequal, Welch's F was reported. Results were

1 considered statistically significant if  $p < 0.05$ . The Shapiro-Wilks test suggested that, for chronic  
2 experiments, peak values of HbT and HbO are normally distributed, however, HbR values are  
3 significantly non-normal. 2-way mixed design was used to compare peak values for HbT, HbO & HbR  
4 (although HbR failed the S-W test for normality, an ANOVA was used as they were considered fairly  
5 robust against small deviations from normality). Inspection of Levene's test suggested that variances  
6 were equal, therefore, Dunnett's (two-sided) multiple comparisons test was used to compare disease  
7 models to WT, and for HbR, Games-Howell multiples comparisons were used. If the Greenhouse-  
8 Geisser estimate of sphericity showed deviation from sphericity (chronic experiments: HbT ( $\epsilon = 0.55$ ),  
9 HbO ( $\epsilon = 0.49$ ) & HbR ( $\epsilon = 0.564$ ), results are reported with Greenhouse-Geisser correction applied.  
10 qRT-PCR data was analysed by performing 1-way ANOVAs with Dunnett's multiple comparisons test  
11 used to compare disease models to WT. P-values  $< 0.05$  were considered statistically significant. All the  
12 data are presented as mean values  $\pm$  standard error of mean (SEM).

13 **Immunohistochemistry.** At the end of terminal experiments, mice were euthanized with an overdose  
14 of pentobarbital (100mg/kg, Euthatal, Merial Animal Health Ltd) and transcardially perfused with 0.9%  
15 saline and brains were dissected. One half-hemisphere of the brains were fixed in formalin and  
16 embedded in paraffin wax, with the other half snap-frozen using isopentane and stored at  $-80^{\circ}\text{C}$ .  $5\mu\text{m}$   
17 coronal sections were obtained using a cryostat. Immunohistochemistry was performed using an avidin-  
18 biotin complex (ABC) method (as described previously (17)). Following slide preparation and antigen  
19 retrieval (pressure cooker at 20psi at  $120^{\circ}\text{C}$  for 45s (pH6.5)), sections underwent additional pre-  
20 treatment in 70% formic acid. Sections were incubated with 1.5% normal serum followed by incubation  
21 with the primary antibody (biotinylated anti-A $\beta$  – 1:100, BioLegend, USA) for 1 hour. Horseradish  
22 peroxidase avidin-biotin complex (Vectastain Elite Kit, Vector Laboratories, UK) was used to visualise  
23 antibody binding along with 3,3-diaminobenzidine tetrahydrochloride (DAB) (Vector Laboratories, UK).  
24 All sections were counterstained with haematoxylin, dehydrated and mounted in DPX. Sections were  
25 imaged using a Nikon Eclipse Ni-U microscope attached to a Nikon DS-Ri1 camera. Plaques were  
26 identified at x40 magnification and manually counted per section.

27  
28 **qRT-PCR.** Snap-frozen hemispheres were homogenised, and RNA was extracted using Direct-zol RNA  
29 MiniPrep kit with TRI-reagent as per the manufacturer's guidelines (Zymo) and RNA quality checked  
30 using NanoDrop<sup>TM</sup> (ThermoFisher Scientific). cDNA was synthesised from the extracted RNA using  
31 the UltraScript 2.0 cDNA synthesis kit (PCR BioSystems) according to the manufacturer's guidelines.  
32 qRT-PCR was performed using PrimeTime qRT-PCR assay primers (IDT) for *IL1 $\beta$*  & *TNF $\alpha$*  with *ACTB*  
33 as the reference housekeeping gene. Luna qRT-PCR Master Mix (NEB) was used with the primers,  
34 cDNA and nuclease free water and each gene for each sample was duplicated. CFX384 Real-Time  
35 System (BioRad) with a C1000 Touch Thermal Cycler (BioRad) was used to perform qRT-PCR  
36 consisting of 40 cycles. Data was analysed using the well-established delta-Ct method (39) by  
37 normalising against *ACTB*.

38  
39 **Acknowledgments.** OS's PhD studentship and consumables were funded by the Neuroimaging in  
40 Cardiovascular Disease (NICAD) network scholarship (University of Sheffield). A British Heart

1 Foundation (BHF) project grant was awarded to SEF to carry out the work using the PCSK9 model  
2 (PG/13/55/30365). The J20-mouse colony was in part funded and supported by Alzheimer's Research  
3 UK (Grant R/153749-12-1). CH is funded by a Sir Henry Dale Fellowship jointly funded by the Wellcome  
4 Trust and the Royal Society (Grant Number 105586/Z/14/Z). MAR is funded by a Conacyt scholarship.  
5 We would like to thank Prof Lennart Mucke (Gladstone Institute of Neurological Disease & Department  
6 of Neurology, UCSF, CA, US) as well as the J. David Gladstone Institutes for the J20-hAPP mice.  
7 Finally, we would like to thank Mr Michael Port for building and maintaining the imaging apparatus and  
8 Dr Luke Boorman for producing MATLAB code for data analysis.

9  
10 **Conflicts of Interest.** The authors have no conflicts of interests to declare.

11  
12 **References:**

- 13 1. O. Shabir, J. Berwick, S. E. Francis, Neurovascular dysfunction in vascular dementia, Alzheimer's and  
14 atherosclerosis. *BMC Neurosci* **19**, 62 (2018).
- 15 2. K. R. Thulborn, J. C. Waterton, P. M. Matthews, G. K. Radda, Oxygenation dependence of the transverse  
16 relaxation time of water protons in whole blood at high field. *Biochim Biophys Acta* **714**, 265-270 (1982).
- 17 3. S. Ogawa, T. M. Lee, A. R. Kay, D. W. Tank, Brain magnetic resonance imaging with contrast dependent  
18 on blood oxygenation. *Proc Natl Acad Sci U S A* **87**, 9868-9872 (1990).
- 19 4. B. V. Zlokovic, Neurovascular pathways to neurodegeneration in Alzheimer's disease and other disorders.  
20 *Nat Rev Neurosci* **12**, 723-738 (2011).
- 21 5. F. Neuropathology Group. Medical Research Council Cognitive, S. Aging, Pathological correlates of late-  
22 onset dementia in a multicentre, community-based population in England and Wales. Neuropathology  
23 Group of the Medical Research Council Cognitive Function and Ageing Study (MRC CFAS). *Lancet* **357**,  
24 169-175 (2001).
- 25 6. F. E. Matthews *et al.*, Epidemiological pathology of dementia: attributable-risks at death in the Medical  
26 Research Council Cognitive Function and Ageing Study. *PLoS Med* **6**, e1000180 (2009).
- 27 7. J. Rahimi, G. G. Kovacs, Prevalence of mixed pathologies in the aging brain. *Alzheimers Res Ther* **6**, 82  
28 (2014).
- 29 8. A. Kapasi, C. DeCarli, J. A. Schneider, Impact of multiple pathologies on the threshold for clinically overt  
30 dementia. *Acta Neuropathol* **134**, 171-186 (2017).
- 31 9. A. J. Lusis, Atherosclerosis. *Nature* **407**, 233-241 (2000).
- 32 10. C. Napoli *et al.*, Intracranial arteries of human fetuses are more resistant to hypercholesterolemia-induced  
33 fatty streak formation than extracranial arteries. *Circulation* **99**, 2003-2010 (1999).
- 34 11. A. Kapasi, J. A. Schneider, Vascular contributions to cognitive impairment, clinical Alzheimer's disease,  
35 and dementia in older persons. *Biochim Biophys Acta* **1862**, 878-886 (2016).
- 36 12. C. Iadecola, The Neurovascular Unit Coming of Age: A Journey through Neurovascular Coupling in Health  
37 and Disease. *Neuron* **96**, 17-42 (2017).
- 38 13. C. Iadecola *et al.*, Vascular Cognitive Impairment and Dementia: JACC Scientific Expert Panel. *J Am Coll*  
39 *Cardiol* **73**, 3326-3344 (2019).
- 40 14. M. M. Bjorklund *et al.*, Induction of atherosclerosis in mice and hamsters without germline genetic  
41 engineering. *Circ Res* **114**, 1684-1689 (2014).
- 42 15. M. Roche-Molina *et al.*, Induction of sustained hypercholesterolemia by single adeno-associated virus-  
43 mediated gene transfer of mutant hPCSK9. *Arterioscler Thromb Vasc Biol* **35**, 50-59 (2015).

- 1 16. L. Mucke *et al.*, High-level neuronal expression of abeta 1-42 in wild-type human amyloid protein precursor  
2 transgenic mice: synaptotoxicity without plaque formation. *J Neurosci* **20**, 4050-4058 (2000).
- 3 17. K. E. Ameen-Ali *et al.*, The Time Course of Recognition Memory Impairment and Glial Pathology in the  
4 hAPP-J20 Mouse Model of Alzheimer's Disease. *J Alzheimers Dis* **68**, 609-624 (2019).
- 5 18. P. S. Sharp *et al.*, Neurovascular coupling preserved in a chronic mouse model of Alzheimer's disease:  
6 Methodology is critical. *J Cereb Blood Flow Metab* 10.1177/0271678X19890830, 271678X19890830  
7 (2019).
- 8 19. T. Kurth *et al.*, Association of Migraine With Aura and Other Risk Factors With Incident Cardiovascular  
9 Disease in Women. *JAMA* **323**, 2281-2289 (2020).
- 10 20. O. Shabir *et al.*, Enhanced Cerebral Blood Volume under Normobaric Hyperoxia in the J20-hAPP Mouse  
11 Model of Alzheimer's Disease. *Sci Rep* **10**, 7518 (2020).
- 12 21. A. Denes *et al.*, Interleukin-1 mediates neuroinflammatory changes associated with diet-induced  
13 atherosclerosis. *J Am Heart Assoc* **1**, e002006 (2012).
- 14 22. C. Ayata *et al.*, Hyperlipidemia disrupts cerebrovascular reflexes and worsens ischemic perfusion defect.  
15 *J Cereb Blood Flow Metab* **33**, 954-962 (2013).
- 16 23. C. Ayata, M. Lauritzen, Spreading Depression, Spreading Depolarizations, and the Cerebral Vasculature.  
17 *Physiol Rev* **95**, 953-993 (2015).
- 18 24. J. P. Dreier, The role of spreading depression, spreading depolarization and spreading ischemia in  
19 neurological disease. *Nat Med* **17**, 439-447 (2011).
- 20 25. P. Ripa, R. Ornello, F. Pistoia, A. Carolei, S. Sacco, Spreading depolarization may link migraine, stroke,  
21 and other cardiovascular disease. *Headache* **55**, 180-182 (2015).
- 22 26. M. Yemisci, K. Eikermann-Haerter, Aura and Stroke: relationship and what we have learnt from preclinical  
23 models. *J Headache Pain* **20**, 63 (2019).
- 24 27. K. Eikermann-Haerter *et al.*, Cerebral autosomal dominant arteriopathy with subcortical infarcts and  
25 leukoencephalopathy syndrome mutations increase susceptibility to spreading depression. *Ann Neurol*  
26 **69**, 413-418 (2011).
- 27 28. R. E. Morton, P. D. St John, S. L. Tyas, Migraine and the risk of all-cause dementia, Alzheimer's disease,  
28 and vascular dementia: A prospective cohort study in community-dwelling older adults. *Int J Geriatr*  
29 *Psychiatry* **34**, 1667-1676 (2019).
- 30 29. B. Li *et al.*, Atherosclerosis is associated with a decrease in cerebral microvascular blood flow and tissue  
31 oxygenation. *PLoS One* **14**, e0221547 (2019).
- 32 30. W. A. Jefferies *et al.*, Adjusting the compass: new insights into the role of angiogenesis in Alzheimer's  
33 disease. *Alzheimers Res Ther* **5**, 64 (2013).
- 34 31. M. S. Grames *et al.*, Gene Transfer Induced Hypercholesterolemia in Amyloid Mice. *J Alzheimers Dis* **65**,  
35 1079-1086 (2018).
- 36 32. O. Bracko *et al.*, High fat diet worsens Alzheimer's disease-related behavioral abnormalities and  
37 neuropathology in APP/PS1 mice, but not by synergistically decreasing cerebral blood flow. *Sci Rep* **10**,  
38 9884 (2020).
- 39 33. Y. R. Gao *et al.*, Time to wake up: Studying neurovascular coupling and brain-wide circuit function in the  
40 un-anesthetized animal. *Neuroimage* **153**, 382-398 (2017).
- 41 34. P. S. Sharp *et al.*, Comparison of stimulus-evoked cerebral hemodynamics in the awake mouse and under  
42 a novel anesthetic regime. *Sci Rep* **5**, 12621 (2015).
- 43 35. H. Taniguchi *et al.*, A resource of Cre driver lines for genetic targeting of GABAergic neurons in cerebral  
44 cortex. *Neuron* **71**, 995-1013 (2011).

- 1 36. L. Madisen *et al.*, A toolbox of Cre-dependent optogenetic transgenic mice for light-induced activation and  
 2 silencing. *Nat Neurosci* **15**, 793-802 (2012).  
 3 37. J. Berwick *et al.*, Neurovascular coupling investigated with two-dimensional optical imaging spectroscopy  
 4 in rat whisker barrel cortex. *Eur J Neurosci* **22**, 1655-1666 (2005).  
 5 38. J. Mayhew *et al.*, Spectroscopic analysis of changes in remitted illumination: the response to increased  
 6 neural activity in brain. *Neuroimage* **10**, 304-326 (1999).  
 7 39. K. J. Livak, T. D. Schmittgen, Analysis of relative gene expression data using real-time quantitative PCR  
 8 and the  $2^{-\Delta\Delta C(T)}$  Method. *Methods* **25**, 402-408 (2001).  
 9

10 **Supplemental Information:**

Responses from all animals to stimulation in the acute-neural session :whisker region

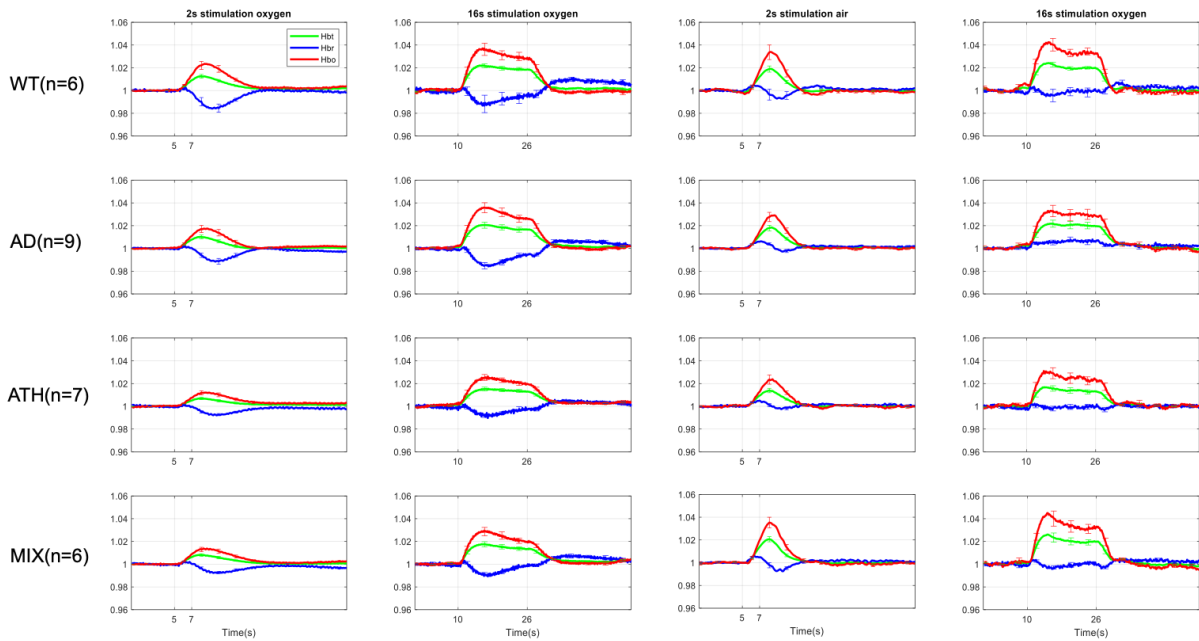

11 **Fig S1. Fractional Changes in Acute Stimulus-Evoked Haemodynamic Responses.** **HbT:** There was no significant overall effect  
 12 of disease  $F(3,24)=1.69$ ,  $p=0.196$ . As expected, there was a significant effect of experiment,  $F(2.16,51.73)=76.72$ ,  $p<0.001$ . There  
 13 was no significant interaction effect between experiment and disease,  $F(6.47,51.73)=1.73$ ,  $p=0.127$ . **HbO:** There was no  
 14 significant overall effect of disease  $F(3,24)=1.36$ ,  $p=0.280$ . There was a significant effect of experiment,  $F(2.02,48.57)=62.10$ ,  
 15  $p<0.001$ . There was no significant interaction effect between experiment and disease,  $F(6.07,48.57)=2.08$ ,  $p=0.072$ . **HbR:** There  
 16 was no significant overall effect of disease  $F(3,24)=1.42$ ,  $p=0.262$ . As expected, there was a significant effect of experiment,  
 17  $F(2.18,52.42)=17.54$ ,  $p<0.001$ . There was a significant interaction effect between experiment and disease  $F(6.55, 52.42)=2.54$ ,  
 18  $p=0.028$ . All error bars (lightly shaded) are  $\pm$ SEM. Vertical dotted lines indicate start and end of stimulations.  
 19  
 20  
 21

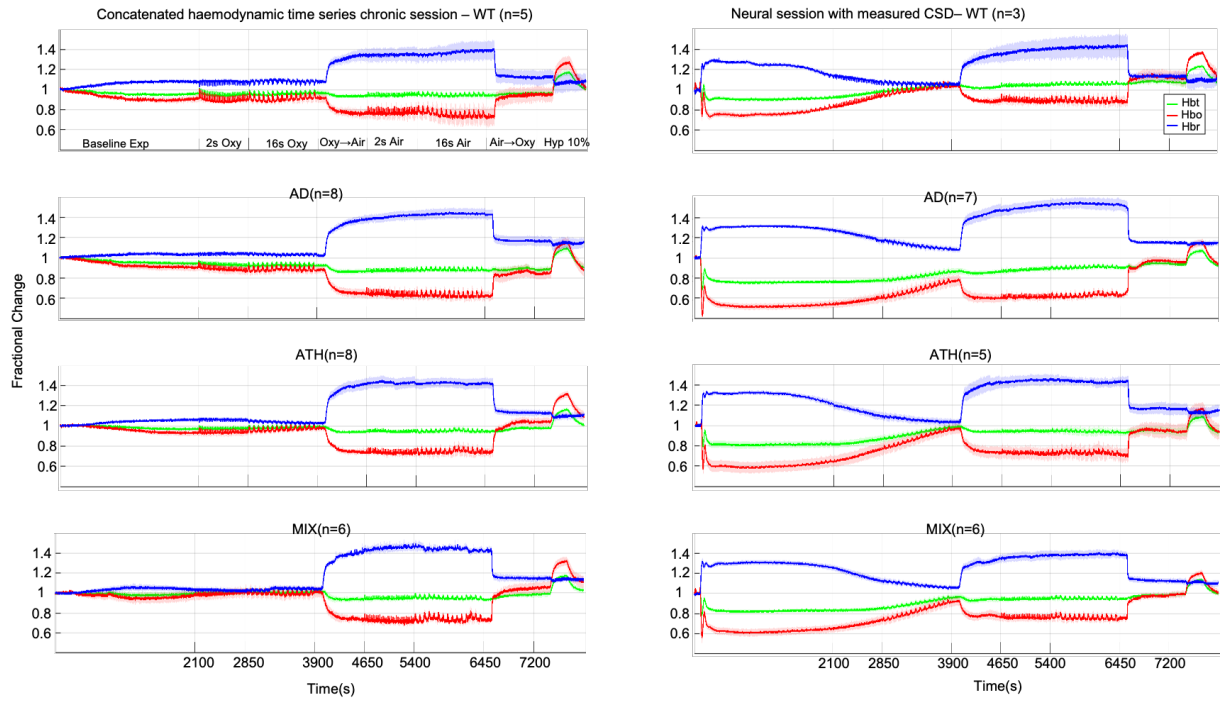

1  
2  
3  
4  
5  
6  
7  
8  
9  
10  
11

**Fig S2.** Concatenated data showing stability and robustness of the mouse imaging preparation. Left) Chronic imaging sessions including a 35-minute haemodynamics baseline before first stimulation. Right) Acute imaging sessions including CSD plus 35-minute haemodynamics recovery before first stimulation.

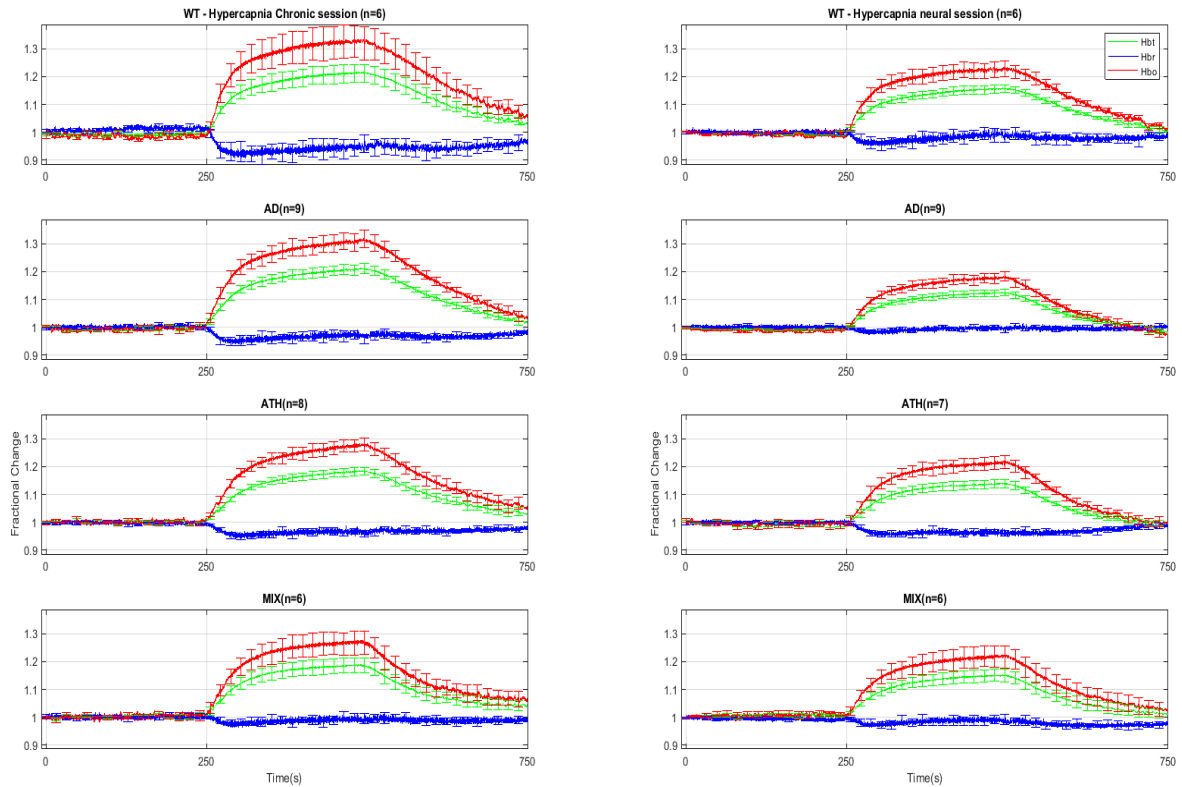

1  
2  
3  
4  
5  
6

**Fig S3.** – Chronic (Left) & Acute (Right) Hypercapnia. Chronic: A 1-way ANOVA showed no significant effect of disease for HbT ( $F(3,12.06)=0.49$ ,  $p=0.694$ ), HbO ( $F(3,11.98)=0.44$ ,  $p=0.732$ ) nor HbR ( $F(3,12.081)=0.98$ ,  $p=0.436$ ). Acute: A 1-way ANOVA showed no significant effect of disease for HbO ( $F(3,12.00)=0.74$ ,  $p=0.549$ ) but there was a significant effect of disease for HbR ( $F(3,11.01)=3.77$ ,  $p=0.044$ ). Games-Howell multiple comparisons showed that, for HbR, there was a significant difference between AD and ATH ( $p=0.019$ ). Kruskal-Wallis test showed no significant effect of disease for HbT:  $H(3)=2.87$ ,  $p=0.412$ . Error bars  $\pm$ SEM.
